# Supplementary material for: Co-crystallization and polymorphic behaviour of 5-fluorouracil
Source: Royal Society of Chemistry journal article supplement (doi:10.1039/c8ce01692e), 2018-11-13

Supporting Information of

## Co-Crystallization and polymorphic behaviours of 5-Fluorouracil

Dennis Enkelmann, Jens Handelsmann, Carsten Schauerte, Klaus Merz

**1. PXRD of polymorphic screening 5-Fluorouracil and nicotinamid (ration 1:1) in methanol (technical grade)**

For comparison: Form II (red), Form I (blue), nicotinamide (purple)

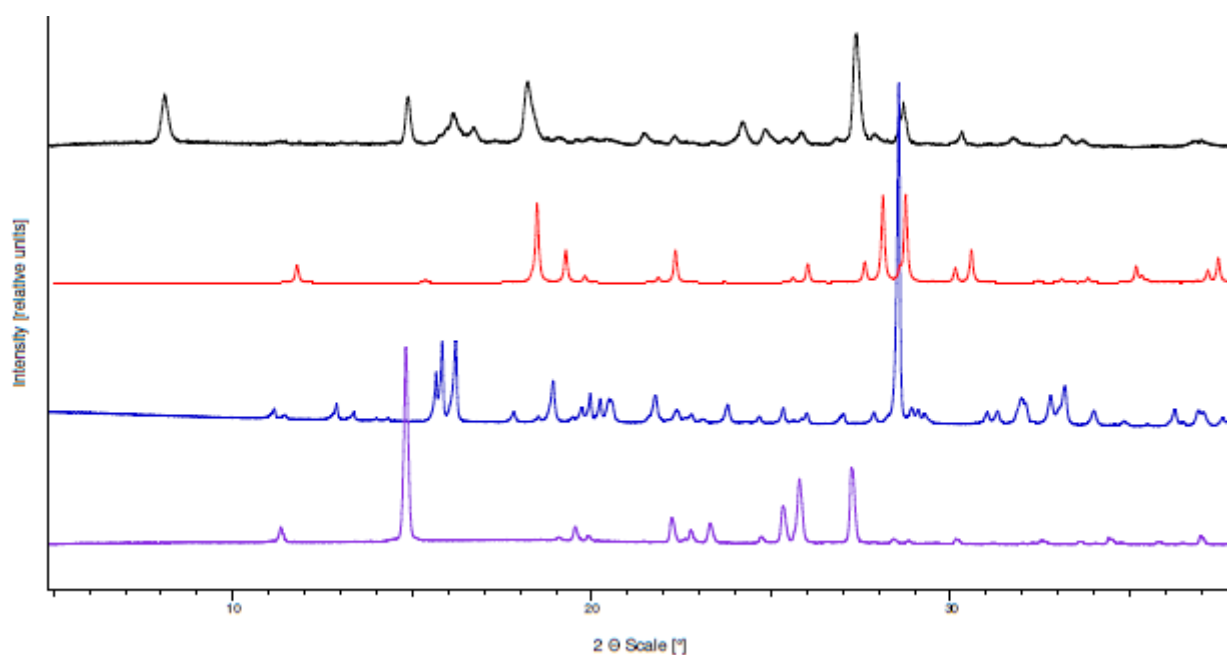

2. (a) Molecular structure of 5-Fluorouracil / 0.5 succinic acid / H<sub>2</sub>O **1** and  
(b) 5-Fluorouracil / 0.5 adipic acid / H<sub>2</sub>O **2** in solid state

(a)

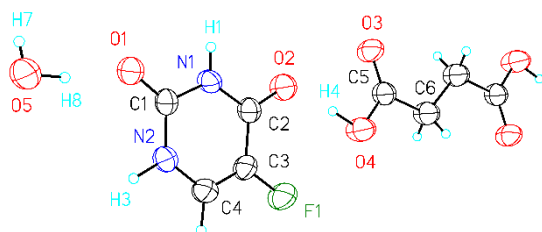

(b)

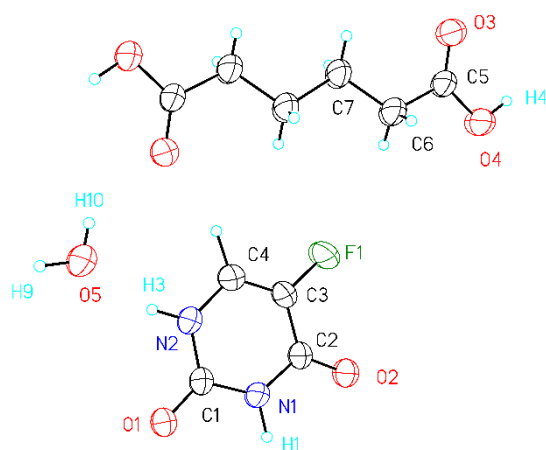

Supplement: c8ce01692e1.pdf [file c8ce01692e1.pdf]
